# Supplementary material for: The Effect of Reaction Conditions and Presence of Magnesium on the Crystallization of Nickel Sulfate
Source: MDPI journal article supplement (doi:10.3390/cryst11121485), 2021-11-30
Supplement: s1 [file s1]

Archive with 1 entries (1 files):
- crystals-1464560-supplementary.pdf
