# Supplementary material for: The Effect of Reaction Conditions and Presence of Magnesium on the Crystallization of Nickel Sulfate
Source: MDPI journal article supplement (doi:10.3390/cryst11121485), 2021-11-30
Supplement: s1 [file s1 › crystals-1464560-supplementary.pdf]

## Supplementary Information

### **The effect of reaction conditions and presence of magnesium on the crystallization of nickel sulfate**

*Ina Beate Jenssen*<sup>1</sup>, *Oluf Bøckman*<sup>2</sup>, *Jens-Petter Andreassen*,<sup>1</sup> and *Seniz Ucar*<sup>1,\*</sup>

<sup>1</sup>*Norwegian University of Science and Technology, Trondheim, Norway*

<sup>2</sup>*Glencore Nikkelverk AS, Kristiansand, Norway*

\* *Correspondence to: seniz.ucar@ntnu.no*

#### **A. XRD spectra of nickel sulfate hydrates**

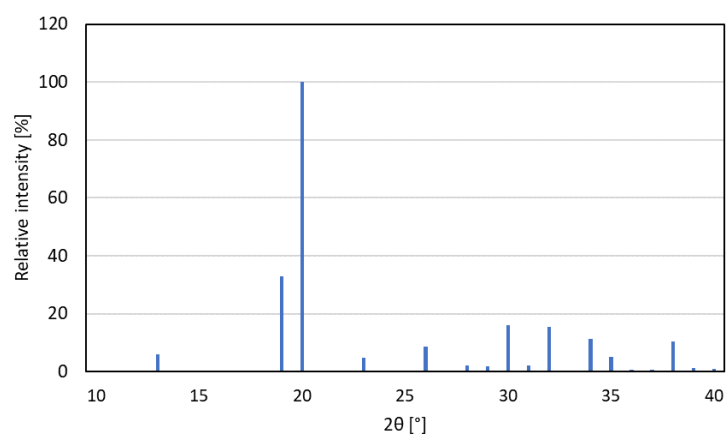

Figure A.1: XRD spectrum of  $\alpha$ -NiSO<sub>4</sub>·6H<sub>2</sub>O, values adapted from the International Centre for Diffraction Data database (ICDD), PDF 04-010-2482; primary, indexed quality, T = 298 K.

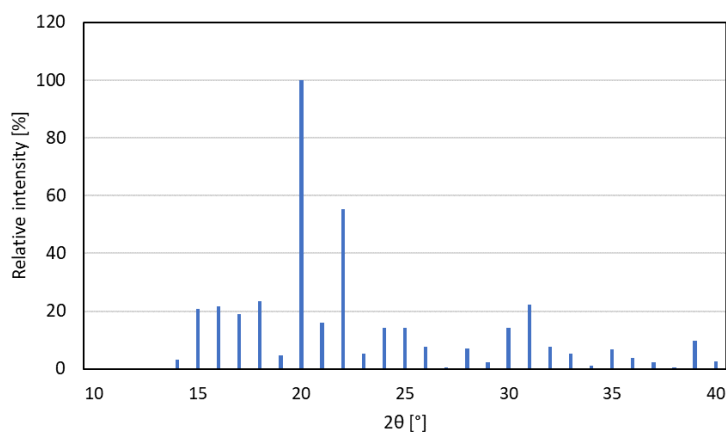

Figure A.2: XRD spectrum of  $\beta$ -NiSO<sub>4</sub>·6H<sub>2</sub>O, values adapted from the International Centre for Diffraction Data database (ICDD), PDF 04-009-4324; primary star quality, T = 294 K.

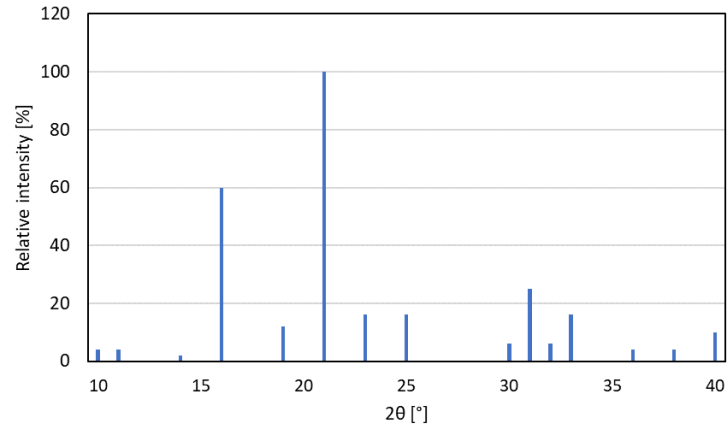

Figure A.3: XRD spectrum of  $\text{NiSO}_4 \cdot 7\text{H}_2\text{O}$ , values adapted from the International Centre for Diffraction Data database (ICDD), PDF 00-001-0403; primary indexed quality,  $T = 298 \text{ K}$ .

## B. Temperature profiles

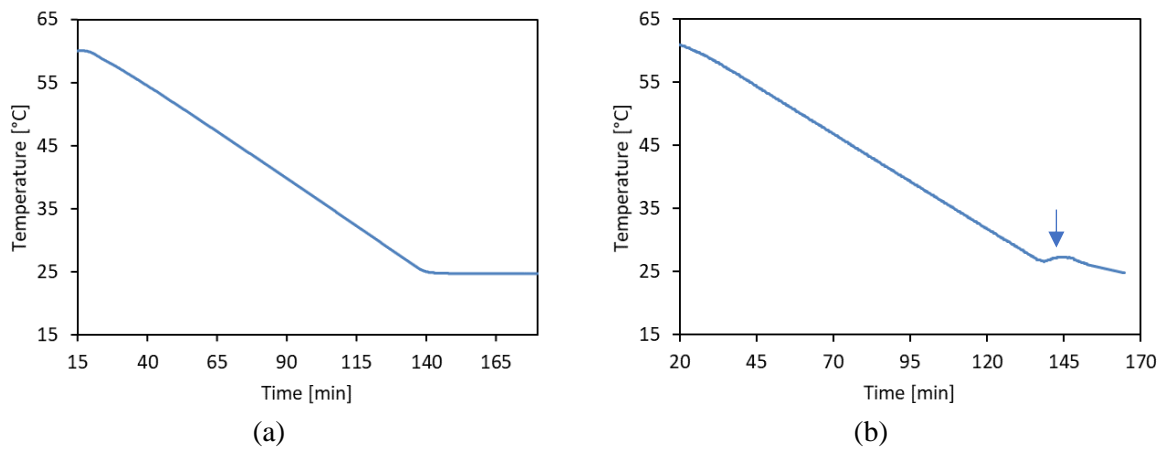

Figure B.1: Temperature evolution as function of time during crystallization of nickel sulfate for temperatures unseeded experiment with (a) no magnesium and (b)  $18 \text{ mg g}^{-1} \text{ Mg}$ . Note the temperature increase in (b), representing crystal formation, whereas no temperature increase is seen, hence no crystal formation, in (a). The cooling rate in both cases is  $0.29 \text{ °C min}^{-1}$ .

### C. Light microscopy images

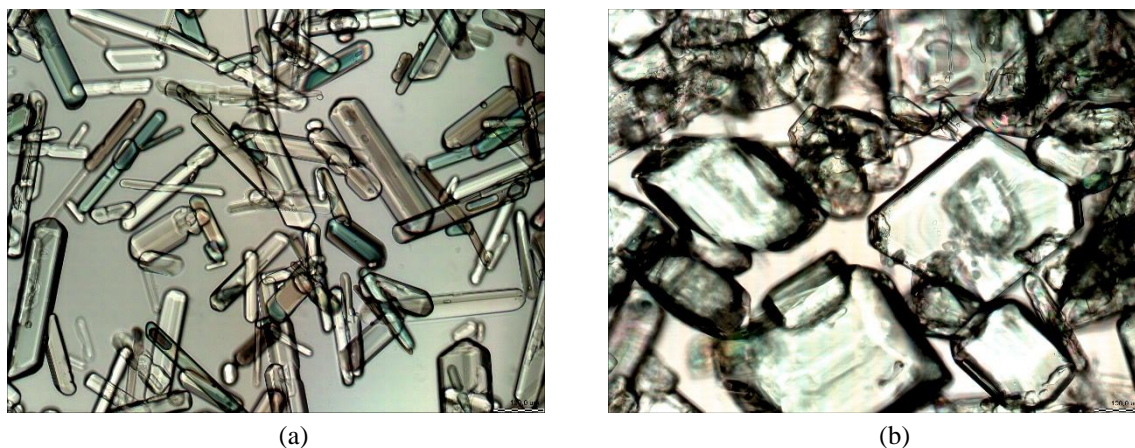

Figure C.1: Light microscopy images of nickel sulfate precipitated with 0.2 g  $\alpha$ -NiSO<sub>4</sub>·6H<sub>2</sub>O seeds and no magnesium present. (a) Product consisting of  $\alpha$ -NiSO<sub>4</sub>·6H<sub>2</sub>O,  $\beta$ -NiSO<sub>4</sub>·6H<sub>2</sub>O and NiSO<sub>4</sub>·7H<sub>2</sub>O, formed at 25 °C and (b)  $\beta$ -NiSO<sub>4</sub>·6H<sub>2</sub>O precipitated at 70 °C. Corresponding micrographs obtained from SEM in Figure 6 in the article.

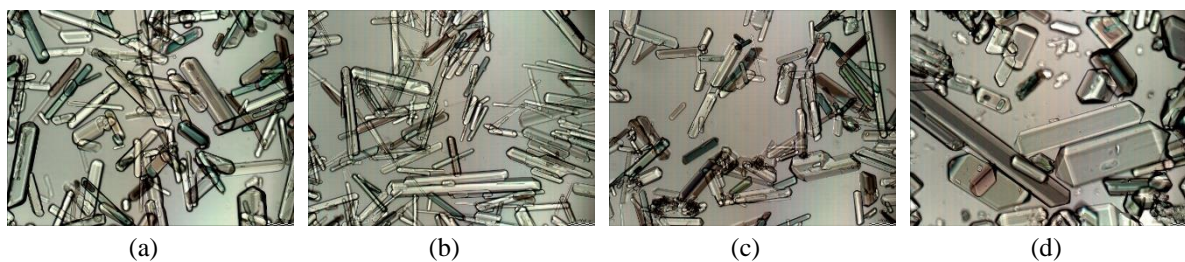

Figure C.2: Light microscopy images of nickel sulfate produced from seeded experiments with 0.2 g  $\alpha$ -NiSO<sub>4</sub>·6H<sub>2</sub>O seeds at 25 °C with (a) 0 mg g<sup>-1</sup> Mg, (b) 5 mg g<sup>-1</sup> Mg, (c) 9 mg g<sup>-1</sup> Mg, and (d) 18 mg g<sup>-1</sup> Mg. Corresponding micrographs obtained from SEM in Figure 10 in the article.

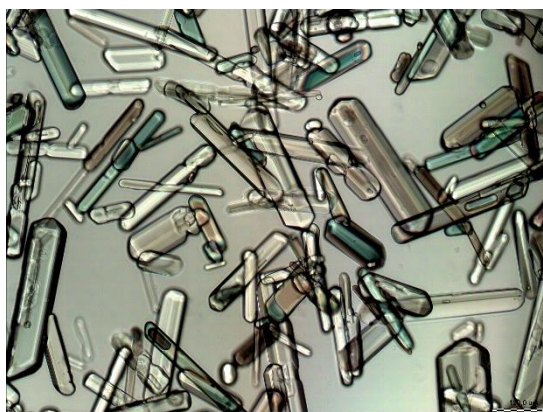

(a)

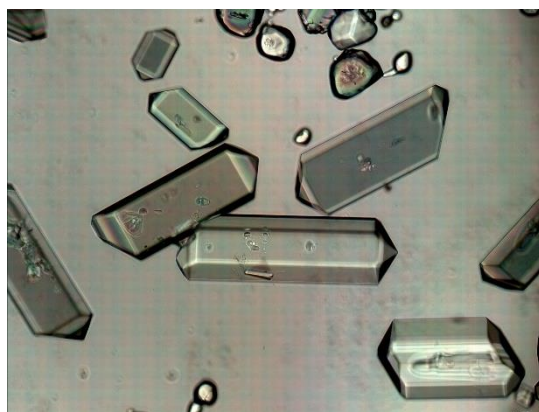

(b)

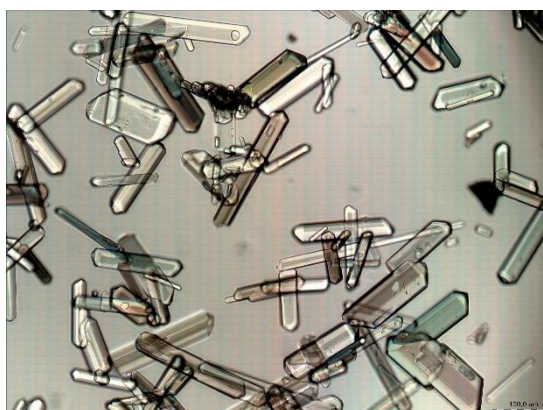

(c)

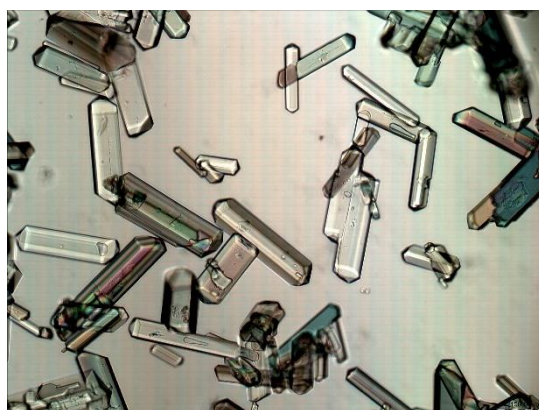

(d)

Figure C.3: Light microscopy images of nickel sulfate produced at 25 °C with different seed amounts: (a) 0.2 g seeds without Mg, (b) 2.0 g seeds without Mg, (c) 0.2 g seeds with 5 mg g<sup>-1</sup> Mg, (d) 2.0 g seeds with 5 mg g<sup>-1</sup> Mg.

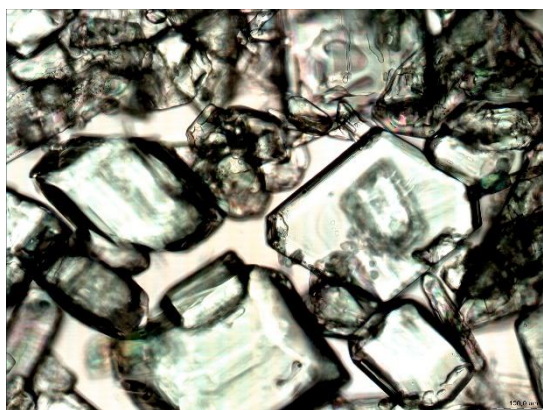

(a)

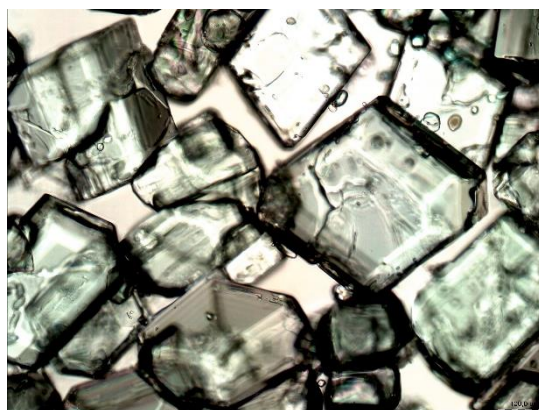

(b)

Figure C.4: Light microscopy images of nickel sulfate produced at 70 °C with different seed amounts: (a) 0.2 g seeds without Mg, (b) 2.0 g seeds without Mg.

## D. Phase transformation in dry state

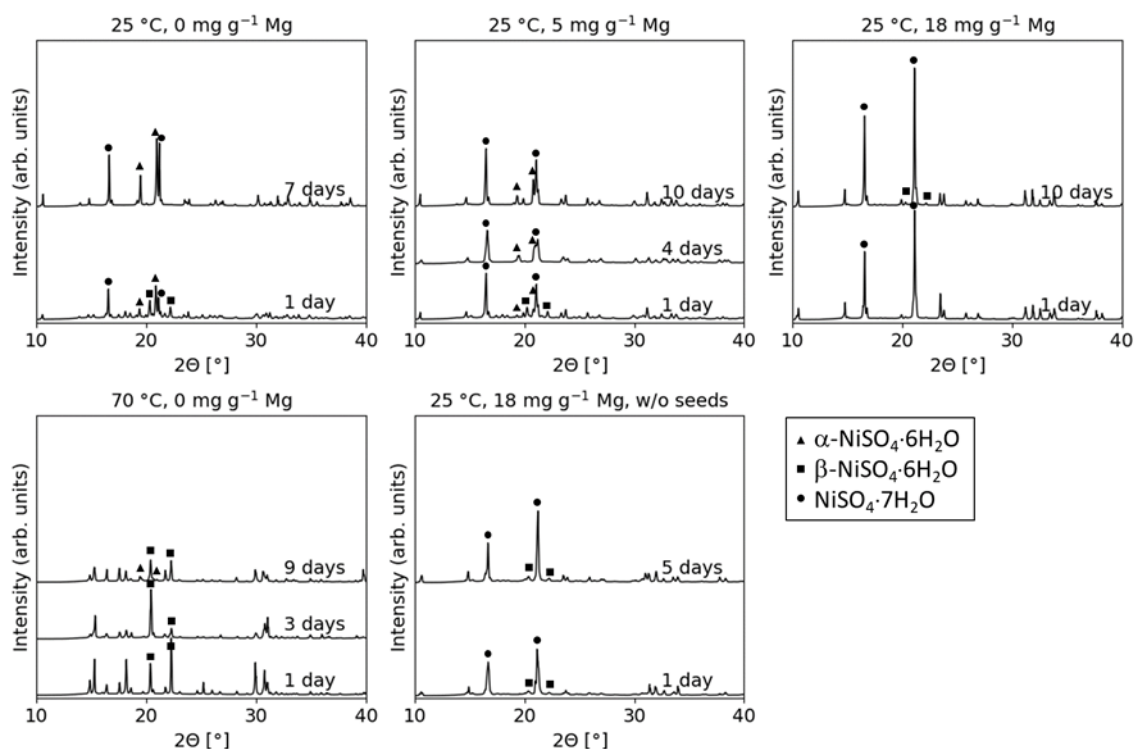

Figure D1. Transformation of nickel sulfate samples in dry state followed by XRD at indicated time points. Nickel sulfate crystallized at the following conditions; with 0.2 g seeds at 25 °C with (a) 0 mg g<sup>-1</sup> Mg, (b) 5 mg g<sup>-1</sup> Mg, and (c) 18 mg g<sup>-1</sup> Mg; (d) with 0.2 g seeds at 70 °C, without Mg, and (e) unseeded at 25 °C, with 18 mg g<sup>-1</sup> Mg.

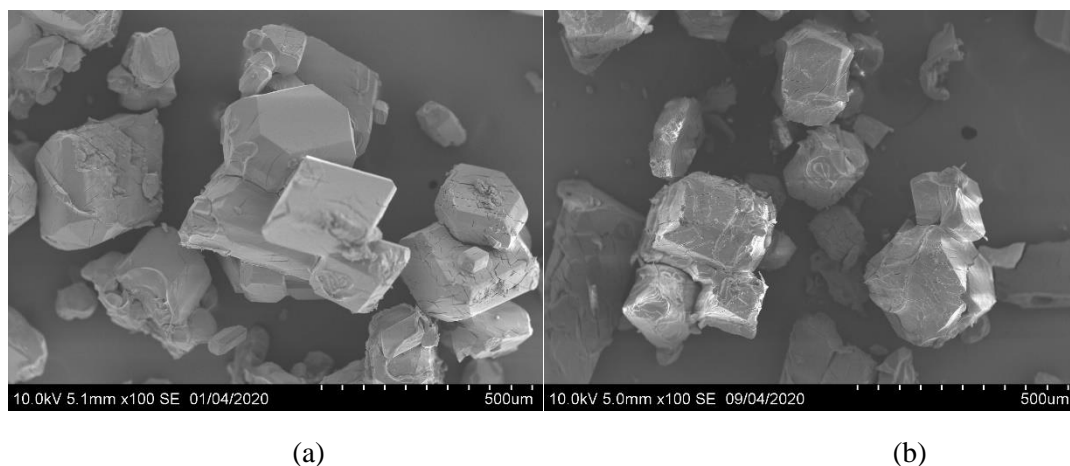

Figure D.2: SEM images of nickel sulfate precipitated at 70 °C with 0.2 g  $\alpha$ -NiSO<sub>4</sub>·6H<sub>2</sub>O seeds and no magnesium present. The images show particles at (a) 1 day and (b) 9 days after the experiment.
